# Supplementary material for: Study of the Antioxidant Effects of Coffee Phenolic Metabolites on C6 Glioma Cells Exposed to Diesel Exhaust Particles
Source: MDPI journal article supplement (doi:10.3390/antiox10081169), 2021-07-23

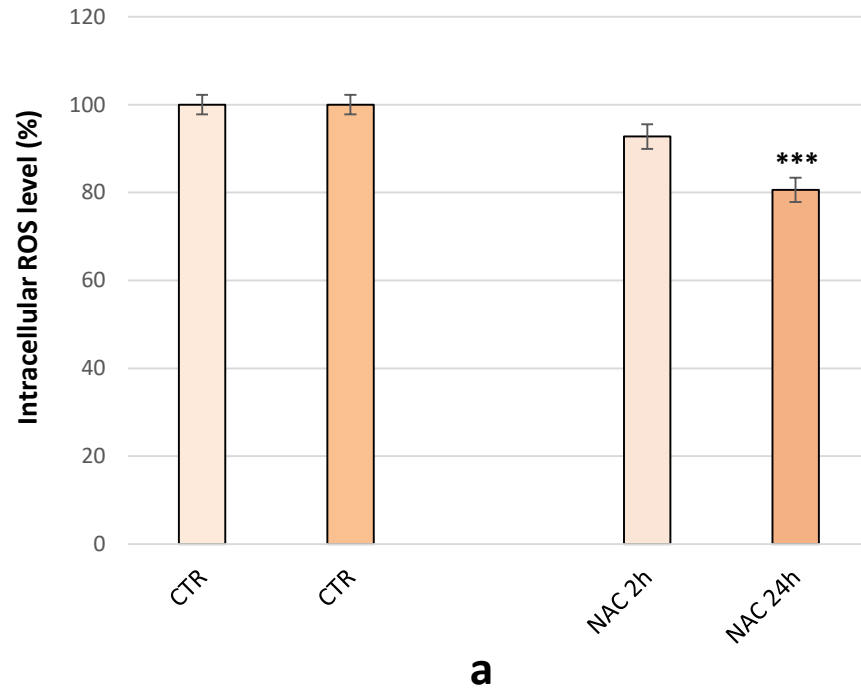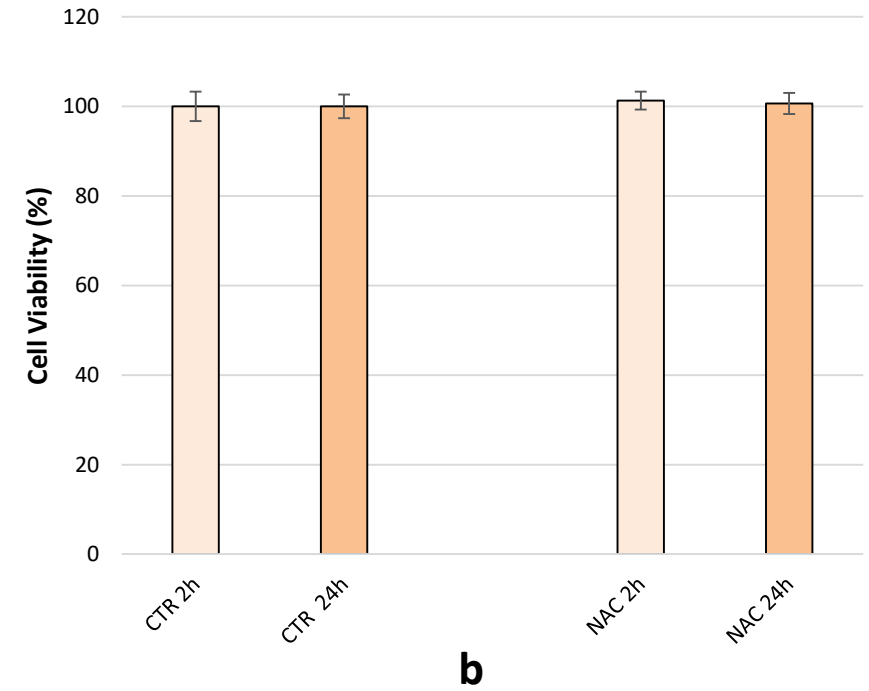

**Figure S1.** Effects of NAC in C6 glioma cells. (a) Intracellular DCF fluorescence intensity of cells treated with 5 mM NAC for 2 or 24h. (b) Cell viability of cells treated with 5 mM NAC for 2 or 24h.  $p < 0,001$  vs CTR

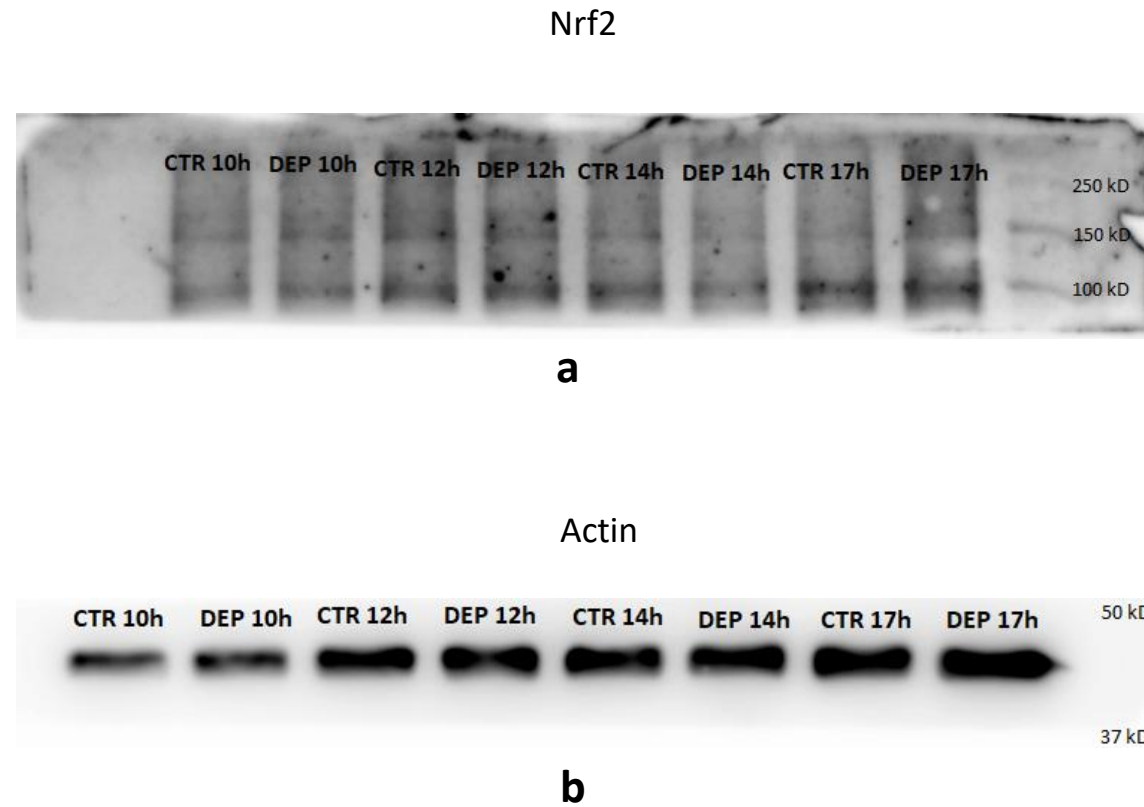

**Figure S2.** Representative immunoblotting of (a) Nrf2, evaluated following cells treatment carried out with 25  $\mu$ g/ml DEP for increasing times and of (b) corresponding actin.

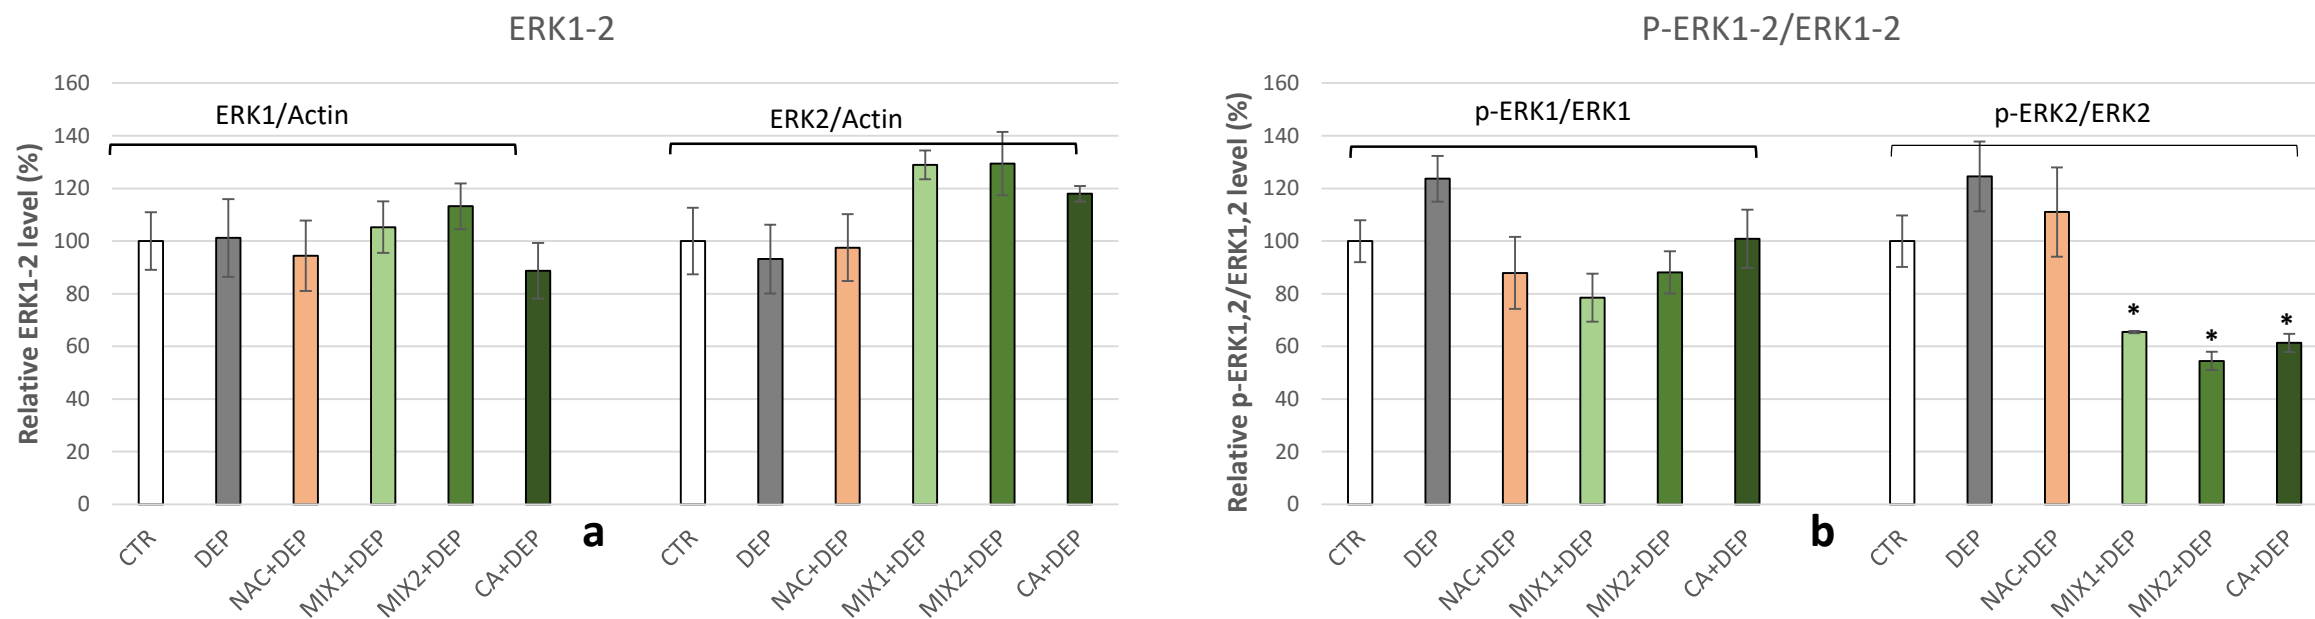

Supplement: s1 [file s1]
